# Supplementary material for: Association of total and different food-derived advanced glycation end-products with risks of all-cause and cause-specific mortality
Source: Royal Society of Chemistry journal article supplement (doi:10.1039/d3fo03945e), 2024-01-01
Supplement: d3fo03945e1.pdf [file d3fo03945e1.pdf]

## Supplementary Materials

**Table S1.** AGEs Score of Total and Different Food Groups

**Table S2.** Association of Total and Different Food-derived AGEs Score with All-cause, CVD and Cancer Mortality

**Table S3.** Population Attributable Risk (PAR) for All-cause, CVD, and Cancer Mortality by AGEs Score from Other Food Groups

**Table S4.** Association of Quartiles of Total AGEs Score with All-cause, CVD, and Cancer Mortality Stratified by Traditional Risk Factors

**Table S5.** Association of Quartiles of Meat-derived AGEs Score with All-cause, CVD, and Cancer Mortality Stratified by Traditional Risk Factors

**Table S6.** Association of Quartiles of Baked Food-derived AGEs Score with All-cause, CVD, and Cancer Mortality Stratified by Traditional Risk Factors

**Table S7.** Association of Quartiles of Potatoes-derived AGEs Score with All-cause, CVD, and Cancer Mortality Stratified by Traditional Risk Factors

**Table S8.** Smoking and Meat-derived AGEs Score with All-cause Mortality, Physical Activity and Meat-derived AGEs Score with Cancer Mortality, and Physical Activity and Potatoes-derived AGEs Score with CVD Mortality

**Table S9.** Estimates for Additive Interaction between Total, Meat-, Baked Food- and Potatoes-derived AGEs Score and Lifestyle Factors in All-cause, CVD, and Cancer Mortality

**Figure S1.** Flow Chart of Study Design

**Figure S2.** Directed Acyclic Graph

**Table S1. AGEs Score of Total and Different Food Groups**

| <b>Food group sources</b>   | <b>Mean (SD)</b> | <b>Median (P<sub>25</sub>, P<sub>75</sub>)</b> | <b>Minimum</b> | <b>Maximum</b> |
|-----------------------------|------------------|------------------------------------------------|----------------|----------------|
| Total AGEs score            | 28.00 (0.38)     | 24.33 (12.67, 39.21)                           | 0.08           | 114.61         |
| Fruits and vegetables       | 0.56 (0.01)      | 0.36 (0.17, 0.75)                              | 0.09           | 8.12           |
| Beverages                   | 0.33 (0.01)      | 0.30 (0.10, 0.60)                              | 0.09           | 5.16           |
| Milk and dairy products     | 0.97 (0.01)      | 0.81 (0.37, 1.31)                              | 0.07           | 16.46          |
| Candy                       | 0.85 (0.02)      | 0.32 (0.10, 1.13)                              | 0.07           | 16.29          |
| Baked foods                 | 7.35 (0.18)      | 4.13 (0.69, 10.96)                             | 0.07           | 81.31          |
| Soup                        | 0.24 (0.004)     | 0.14 (0.10, 0.27)                              | 0.09           | 6.10           |
| Meat and meat products      | 4.11 (0.10)      | 2.43 (0.65, 5.39)                              | 0.06           | 94.70          |
| Seafood                     | 0.50 (0.01)      | 0.10 (0.09, 0.61)                              | 0.10           | 16.59          |
| Cereal and cereal products  | 6.32 (0.11)      | 4.63 (0.89, 79.16)                             | 0.09           | 79.16          |
| Potatoes and their products | 0.40 (0.01)      | 0.27 (0.11, 0.49)                              | 0.07           | 5.18           |
| Bean and nut products       | 6.59 (0.23)      | 1.81 (0.10, 8.69)                              | 0.08           | 101.36         |
| Eggs and egg products       | 0.51 (0.01)      | 0.37 (0.10, 0.71)                              | 0.08           | 14.03          |
| Oil and condiments          | 0.12 (0.001)     | 0.11 (0.10, 0.14)                              | 0.09           | 0.75           |

Data were expressed as weighted mean (SD), weighted median (P<sub>25</sub>, P<sub>75</sub>), weighted minimum and weighted maximum.

Abbreviations: AGEs, advanced glycation end products; SD, standard deviation.

**Table S2. Association of Total and Different Food-derived AGEs Score with All-cause, CVD and Cancer Mortality**

| Food group sources             | All-cause Mortality |                         |                           | CVD Mortality |                         |                           | Cancer Mortality |                         |                           |
|--------------------------------|---------------------|-------------------------|---------------------------|---------------|-------------------------|---------------------------|------------------|-------------------------|---------------------------|
|                                | Death/N             | HR (95%CI)              | <i>P</i> <sub>trend</sub> | Death/N       | HR (95%CI)              | <i>P</i> <sub>trend</sub> | Death/N          | HR (95%CI)              | <i>P</i> <sub>trend</sub> |
| <b>Total AGEs score</b>        |                     |                         |                           |               |                         |                           |                  |                         |                           |
| Q1 (0.08-12.67)                | 610/2783            | 1.00 (ref.)             |                           | 145/2783      | 1.00 (ref.)             |                           | 109/2783         | 1.00 (ref.)             |                           |
| Q2 (12.67-24.34)               | 1403/4749           | 0.91 (0.73-1.15)        | 0.0806                    | 427/4749      | 1.10 (0.85-1.42)        | <0.0001                   | 288/4749         | 1.01 (0.62-1.64)        | 0.4982                    |
| Q3 (24.34-39.21)               | 2313/6560           | 0.99 (0.80-1.22)        |                           | 786/6560      | <b>1.72 (1.27-2.32)</b> |                           | 480/6560         | 0.96 (0.67-1.37)        |                           |
| Q4 (39.21-114.61)              | 3655/8032           | 1.09 (0.91-1.32)        |                           | 1310/8032     | <b>1.86 (1.39-2.50)</b> |                           | 767/8032         | 1.08 (0.78-1.48)        |                           |
| Per SD increment               |                     | <b>1.01 (1.00-1.02)</b> |                           |               | <b>1.01 (1.00-1.02)</b> |                           |                  | 1.00 (0.99-1.01)        |                           |
| <b>Fruits and vegetables</b>   |                     |                         |                           |               |                         |                           |                  |                         |                           |
| Q1 (0.09-0.17)                 | 433/2253            | 1.00 (ref.)             |                           | 89/2253       | 1.00 (ref.)             |                           | 78/2253          | 1.00 (ref.)             |                           |
| Q2 (0.17-0.35)                 | 925/3236            | 0.98 (0.75-1.26)        | 0.2397                    | 243/3236      | 0.84 (0.53-1.33)        | <0.0001                   | 167/3236         | 1.23 (0.84-1.81)        | <b>0.0153</b>             |
| Q3 (0.35-0.75)                 | 1979/5889           | 0.90 (0.75-1.08)        |                           | 650/5889      | 1.43 (0.96-2.14)        |                           | 421/5889         | 1.13 (0.76-1.69)        |                           |
| Q4 (0.75-8.12)                 | 4644/10746          | 1.07 (0.90-1.28)        |                           | 2668/10746    | <b>2.10 (1.49-2.94)</b> |                           | 978/10746        | <b>1.61 (1.09-2.38)</b> |                           |
| Per SD increment               |                     | <b>1.10 (1.04-1.17)</b> |                           |               | <b>1.53 (1.42-1.64)</b> |                           |                  | <b>1.25 (1.11-1.41)</b> |                           |
| <b>Beverages</b>               |                     |                         |                           |               |                         |                           |                  |                         |                           |
| Q1 (0.09-0.10)                 | 1086/5044           | 1.00 (ref.)             |                           | 356/5044      | 1.00 (ref.)             |                           | 209/5044         | 1.00 (ref.)             |                           |
| Q2 (0.10-0.30)                 | 2136/6446           | 1.21 (1.03-1.41)        | 0.8135                    | 787/6446      | 1.30 (1.02-1.66)        | 0.1289                    | 403/6446         | 1.39 (0.99-1.96)        | 0.1345                    |
| Q3 (0.30-0.60)                 | 2899/6459           | 1.05 (0.90-1.22)        |                           | 978/6459      | 0.95 (0.76-1.19)        |                           | 595/6459         | 1.20 (0.92-1.56)        |                           |
| Q4 (0.60-5.16)                 | 1860/4175           | 1.08 (0.92-1.27)        |                           | 547/4175      | 0.94 (0.75-1.18)        |                           | 437/4175         | 1.36 (1.02-1.82)        |                           |
| Per SD increment               |                     | 0.99 (0.88-1.11)        |                           |               | 0.94 (0.77-1.16)        |                           |                  | <b>1.29 (1.13-1.46)</b> |                           |
| <b>Milk and dairy products</b> |                     |                         |                           |               |                         |                           |                  |                         |                           |
| Q1 (0.07-0.37)                 | 1696/4808           | 1.00 (ref.)             |                           | 493/4808      | 1.00 (ref.)             |                           | 345/4808         | 1.00 (ref.)             |                           |
| Q2 (0.37-0.81)                 | 1779/5528           | 1.04 (0.88-1.22)        | <b>0.0317</b>             | 578/5528      | 1.29 (0.99-1.67)        | <0.0001                   | 373/5528         | 0.97 (0.73-1.30)        | 0.1345                    |
| Q3 (0.81-1.31)                 | 2412/6209           | 1.14 (0.95-1.37)        |                           | 892/6209      | <b>1.63 (1.25-2.12)</b> |                           | 528/6209         | 1.34 (0.99-1.81)        |                           |
| Q4 (1.31-16.46)                | 2094/5579           | 1.17 (0.99-1.38)        |                           | 705/5579      | <b>1.44 (1.21-1.71)</b> |                           | 398/5579         | 1.08 (0.81-1.44)        |                           |
| Per SD increment               |                     | <b>1.06 (1.00-1.12)</b> |                           |               | <b>1.11 (1.05-1.12)</b> |                           |                  | 1.01 (0.92-1.11)        |                           |

---

**Candy**

|                  |           |                  |        |          |                         |               |          |                  |        |
|------------------|-----------|------------------|--------|----------|-------------------------|---------------|----------|------------------|--------|
| Q1 (0.07-0.10)   | 724/3082  | 1.00 (ref.)      |        | 190/3082 | 1.00 (ref.)             |               | 149/3082 | 1.00 (ref.)      |        |
| Q2 (0.10-0.32)   | 2225/5390 | 1.11 (0.95-1.29) |        | 712/5390 | 1.36 (0.95-1.94)        |               | 418/5390 | 1.08 (0.80-1.45) |        |
|                  |           |                  | 0.0615 |          |                         | <b>0.0365</b> |          |                  | 0.7452 |
| Q3 (0.32-1.13)   | 2222/6718 | 0.91 (0.76-1.10) |        | 771/6718 | 1.39 (0.98-1.97)        |               | 455/6718 | 0.90 (0.65-1.24) |        |
| Q4 (1.13-16.29)  | 2810/6934 | 0.94 (0.80-1.12) |        | 995/6934 | <b>1.45 (1.02-2.05)</b> |               | 622/6934 | 1.11 (0.79-1.55) |        |
| Per SD increment |           | 0.97 (0.94-1.00) |        |          | 1.04 (0.99-1.10)        |               |          | 0.99 (0.93-1.06) |        |

**Baked foods**

|                  |            |                         |               |            |                         |                   |           |                         |               |
|------------------|------------|-------------------------|---------------|------------|-------------------------|-------------------|-----------|-------------------------|---------------|
| Q1 (0.07-0.69)   | 470/2358   | 1.00 (ref.)             |               | 93/2358    | 1.00 (ref.)             |                   | 77/2358   | 1.00 (ref.)             |               |
| Q2 (0.69-4.13)   | 869/3372   | 0.92 (0.71-1.18)        |               | 248/3372   | 1.01 (0.71-1.43)        |                   | 172/3372  | 0.96 (0.58-1.58)        |               |
|                  |            |                         | <b>0.0145</b> |            |                         | <b>&lt;0.0001</b> |           |                         | <b>0.0098</b> |
| Q3 (4.13-10.96)  | 2122/6126  | 1.10 (0.82-1.21)        |               | 715/6126   | <b>1.54 (1.17-2.02)</b> |                   | 410/6126  | 1.12 (0.76-1.65)        |               |
| Q4 (10.96-81.31) | 4520/10268 | 1.21 (0.99-1.48)        |               | 1612/10268 | <b>2.13 (1.59-2.86)</b> |                   | 985/10268 | 1.43 (0.95-2.16)        |               |
| Per SD increment |            | <b>1.01 (1.00-1.02)</b> |               |            | <b>1.02 (1.01-1.03)</b> |                   |           | <b>1.01 (1.00-1.02)</b> |               |

**Soup**

|                  |           |                  |        |           |                         |                   |          |                  |        |
|------------------|-----------|------------------|--------|-----------|-------------------------|-------------------|----------|------------------|--------|
| Q1 (0.09-0.10)   | 1389/3922 | 1.00 (ref.)      |        | 410/3922  | 1.00 (ref.)             |                   | 267/3922 | 1.00 (ref.)      |        |
| Q2 (0.10-0.14)   | 1248/4560 | 1.05 (0.89-1.24) |        | 393/4560  | <b>1.43 (1.07-1.91)</b> |                   | 308/4560 | 1.03 (0.75-1.40) |        |
|                  |           |                  | 0.5666 |           |                         | <b>&lt;0.0001</b> |          |                  | 0.6428 |
| Q3 (0.14-0.27)   | 2997/7649 | 1.02 (0.89-1.17) |        | 1048/7649 | <b>1.56 (1.29-1.89)</b> |                   | 617/7649 | 1.10 (0.84-1.45) |        |
| Q4 (0.27-6.10)   | 2347/5993 | 1.06 (0.91-1.24) |        | 817/5993  | <b>1.62 (1.31-2.02)</b> |                   | 452/5993 | 1.06 (0.76-1.49) |        |
| Per SD increment |           | 1.14 (0.96-1.36) |        |           | <b>1.66 (1.38-2.00)</b> |                   |          | 1.08 (0.77-1.52) |        |

**Meat and meat products**

|                  |           |                         |               |           |                         |                   |          |                         |               |
|------------------|-----------|-------------------------|---------------|-----------|-------------------------|-------------------|----------|-------------------------|---------------|
| Q1 (0.06-0.65)   | 589/2347  | 1.00 (ref.)             |               | 125/2347  | 1.00 (ref.)             |                   | 93/2347  | 1.00 (ref.)             |               |
| Q2 (0.65-2.43)   | 1358/3870 | 1.06 (0.85-1.33)        |               | 446/3870  | <b>1.43 (1.05-1.95)</b> |                   | 262/3870 | 1.07 (0.81-1.40)        |               |
|                  |           |                         | <b>0.0082</b> |           |                         | <b>&lt;0.0001</b> |          |                         | <b>0.0023</b> |
| Q3 (2.43-5.39)   | 2706/7173 | 1.15 (0.95-1.38)        |               | 994/7173  | <b>1.92 (1.35-2.73)</b> |                   | 551/7173 | 1.23 (0.88-1.72)        |               |
| Q4 (5.39-94.70)  | 3328/8734 | <b>1.21 (1.01-1.45)</b> |               | 1103/8734 | <b>1.91 (1.35-2.70)</b> |                   | 738/8734 | <b>1.31 (1.02-1.69)</b> |               |
| Per SD increment |           | <b>1.01 (1.00-1.02)</b> |               |           | <b>1.02 (1.01-1.03)</b> |                   |          | 1.01 (0.99-1.03)        |               |

**Seafood**

|                |            |                  |        |            |                         |               |           |                  |        |
|----------------|------------|------------------|--------|------------|-------------------------|---------------|-----------|------------------|--------|
| Q1 (0.09-0.10) | 510/2621   | 1.00 (ref.)      |        | 127/2621   | 1.00 (ref.)             |               | 116/2621  | 1.00 (ref.)      |        |
| Q2 (0.10-0.11) | 974/2909   | 1.18 (0.97-1.42) | 0.7433 | 248/2909   | 1.07 (0.62-1.84)        | <b>0.0050</b> | 162/2909  | 0.94 (0.63-1.39) | 0.0953 |
| Q3 (0.11-0.61) | 4220/10096 | 1.24 (1.02-1.51) |        | 1501/10096 | <b>1.62 (1.02-2.56)</b> |               | 867/10096 | 1.71 (1.12-2.59) |        |

---

|                                    |           |                         |        |           |                         |        |          |                         |        |
|------------------------------------|-----------|-------------------------|--------|-----------|-------------------------|--------|----------|-------------------------|--------|
| Q4 (0.61-16.59)                    | 2277/6498 | 1.04 (0.85-1.27)        |        | 792/6498  | 1.45 (0.95-2.22)        |        | 499/6498 | 1.17 (0.80-1.73)        |        |
| Per SD increment                   |           | 0.96 (0.90-1.02)        |        |           | 1.10 (0.99-1.22)        |        |          | 0.97 (0.86-1.10)        |        |
| <b>Cereal and cereal products</b>  |           |                         |        |           |                         |        |          |                         |        |
| Q1 (0.09-0.89)                     | 1142/3453 | 1.00 (ref.)             |        | 293/3453  | 1.00 (ref.)             |        | 255/3453 | 1.00 (ref.)             |        |
| Q2 (0.89-4.63)                     | 2094/6626 | 1.09 (0.94-1.27)        |        | 691/6626  | <b>1.36 (1.07-1.74)</b> |        | 461/6626 | 1.05 (0.72-1.53)        |        |
| Q3 (4.63-9.59)                     | 1951/5644 | 1.01 (0.89-1.15)        | 0.3092 | 630/5644  | 1.07 (0.79-1.45)        | 0.0307 | 416/5644 | 0.93 (0.70-1.24)        | 0.2488 |
| Q4 (9.59-79.16)                    | 2794/6401 | 1.10 (0.95-1.26)        |        | 1054/6401 | <b>1.40 (1.13-1.74)</b> |        | 512/6401 | 0.88 (0.64-1.19)        |        |
| Per SD increment                   |           | 1.01 (0.99-1.02)        |        |           | <b>1.01 (1.00-1.02)</b> |        |          | 0.99 (0.98-1.01)        |        |
| <b>Potatoes and their products</b> |           |                         |        |           |                         |        |          |                         |        |
| Q1 (0.07-0.11)                     | 607/2591  | 1.00 (ref.)             |        | 139/2591  | 1.00 (ref.)             |        | 110/2591 | 1.00 (ref.)             |        |
| Q2 (0.11-0.27)                     | 2492/6896 | 1.06 (0.89-1.26)        |        | 831/6896  | 1.33 (0.92-1.95)        |        | 511/6896 | 1.38 (0.90-2.13)        |        |
| Q3 (0.27-0.49)                     | 3014/7787 | 1.12 (0.97-1.30)        | 0.2438 | 1062/7787 | <b>1.52 (1.10-2.09)</b> | 0.0186 | 650/7787 | 1.50 (1.01-2.21)        | 0.3424 |
| Q4 (0.49-5.18)                     | 1868/4850 | 1.08 (0.91-1.28)        |        | 636/4850  | <b>1.41 (1.00-1.99)</b> |        | 373/4850 | 1.22 (0.80-1.87)        |        |
| Per SD increment                   |           | 1.14 (0.97-1.33)        |        |           | <b>1.35 (1.01-1.68)</b> |        |          | 1.01 (0.74-1.35)        |        |
| <b>Bean and nut products</b>       |           |                         |        |           |                         |        |          |                         |        |
| Q1 (0.08-0.10)                     | 1019/4357 | 1.00 (ref.)             |        | 287/4357  | 1.00 (ref.)             |        | 220/4357 | 1.00 (ref.)             |        |
| Q2 (0.10-1.81)                     | 2701/6709 | 1.18 (0.99-1.40)        |        | 923/6709  | 1.34 (0.99-1.79)        |        | 532/6709 | 1.18 (0.81-1.70)        |        |
| Q3 (1.81-8.69)                     | 2463/6800 | 1.12 (0.95-1.33)        | 0.5644 | 844/6800  | 1.44 (1.10-1.90)        | 0.1309 | 509/6800 | 1.12 (0.84-1.49)        | 0.5823 |
| Q4 (8.69-101.36)                   | 1798/4258 | 1.02 (0.84-1.25)        |        | 614/4258  | 1.35 (1.03-1.76)        |        | 383/4258 | 1.12 (0.88-1.43)        |        |
| Per SD increment                   |           | 0.99(0.98-1.00)         |        |           | 1.00 (0.99-1.01)        |        |          | 0.99 (0.98-1.00)        |        |
| <b>Eggs and egg products</b>       |           |                         |        |           |                         |        |          |                         |        |
| Q1 (0.08-0.10)                     | 794/3221  | 1.00 (ref.)             |        | 225/3221  | 1.00 (ref.)             |        | 146/3221 | 1.00(ref.)              |        |
| Q2 (0.10-0.37)                     | 2598/6846 | 1.11 (0.97-1.27)        |        | 940/6846  | 1.87 (1.43-2.44)        |        | 548/6846 | <b>1.66 (1.24-2.23)</b> |        |
| Q3 (0.37-0.71)                     | 1637/4853 | 1.01 (0.89-1.14)        | 0.0431 | 557/4853  | 1.61 (1.27-2.05)        | 0.0645 | 316/4853 | 1.14 (0.79-1.63)        | 0.0445 |
| Q4 (0.71-14.03)                    | 2952/7204 | <b>1.18 (1.03-1.35)</b> |        | 946/7204  | 1.63 (1.21-2.19)        |        | 634/7204 | <b>1.72 (1.22-2.41)</b> |        |
| Per SD increment                   |           | 1.11 (1.05-1.17)        |        |           | 1.07 (0.97-1.18)        |        |          | 1.17 (1.07-1.28)        |        |
| <b>Oil and condiments</b>          |           |                         |        |           |                         |        |          |                         |        |
| Q1 (0.09-0.10)                     | 656/3052  | 1.00 (ref.)             | 0.0668 | 181/3052  | 1.00 (ref.)             | 0.0064 | 148/3052 | 1.00 (ref.)             | 0.4831 |

|                  |           |                  |           |                          |          |                  |
|------------------|-----------|------------------|-----------|--------------------------|----------|------------------|
| Q2 (0.10-0.11)   | 1602/4114 | 1.14 (0.96-1.36) | 512/4114  | 1.05 (0.70-1.56)         | 278/4114 | 1.26 (0.89-1.78) |
| Q3 (0.11-0.14)   | 3580/9489 | 1.21 (1.02-1.43) | 1259/9489 | <b>1.73 (1.18-2.55)</b>  | 762/9489 | 1.41 (0.94-2.13) |
| Q4 (0.14-0.75)   | 2143/5469 | 1.18 (0.99-1.40) | 716/5469  | 1.39 (0.92-2.10)         | 456/5469 | 1.19 (0.85-1.67) |
| Per SD increment |           | 1.74 (0.46-6.67) |           | <b>4.57 (1.20-19.00)</b> |          | 0.25 (0.02-3.42) |

Total and different food-derived AGEs scores were non-normally distributed, and thus natural log transformed. The weighted Cox proportional hazard regression model adjusted for age (continuous), gender (female, male), race (Non-Hispanic White, Non-Hispanic Black, Mexican American and others), education (below high school, high school, college or above), marital status (married or living with partner, divorced or separated or widowed, never), poverty income ratio (0-1.30, 1.31-3.50, >3.50), body mass index (<25, 25-30, >30 kg/m<sup>2</sup>), physical activity (vigorous, moderate, inactive), smoking status (never, former, current), drinking status (never, moderate, heavy), energy (continuous), cancer (yes, no).

$P_{\text{trend}}$  was calculated by assigning the categorical AGEs score as a continuous variable.

Abbreviations: AGEs, advanced glycation end products; HR, hazard ratio; SD, standard deviation; CVD, cardiovascular disease; CI, confidence interval.

**Table S3. Population Attributable Risk (PAR) for All-cause, CVD, and Cancer Mortality by AGEs from Other Food Groups**

| Food group sources                | PAR (% , 95% confidence interval) |                   |                  |
|-----------------------------------|-----------------------------------|-------------------|------------------|
|                                   | All-cause Mortality               | CVD Mortality     | Cancer Mortality |
| <b>Milk and dairy products</b>    |                                   |                   |                  |
| ≥ Q4                              | 0 (-1.3, 1.4)                     | -0.002            | -0.08            |
| ≥ Q3                              | 2.1 (-0.4, 4.6)                   | 9.0 (4.7, 13.3)   | 3.0 (2.4, 8.3)   |
| ≥ Q2                              | -0.02                             | 12.3 (5.2, 19.2)  | -0.01            |
| <b>Cereal and cereal products</b> |                                   |                   |                  |
| ≥ Q4                              | 5.0 (3.4, 6.6)                    | 10.4 (7.5, 13.2)  | 1.3 (-2.1, 4.6)  |
| ≥ Q3                              | 5.3 (3.7, 6.9)                    | 10.7 (7.9, 13.6)  | 2.1 (-3.5, 7.6)  |
| ≥ Q2                              | -0.002                            | 22.5 (14.1, 30.7) | -0.10            |
| <b>Bean and nut products</b>      |                                   |                   |                  |
| ≥ Q4                              | 1.4 (0.1, 2.6)                    | 1.2 (-1.0, 3.4)   | 3.4 (0.6, 6.2)   |
| ≥ Q3                              | 0.3 (-2.2, 2.7)                   | 3.1 (-1.1, 7.3)   | 2.0 (-3.3, 7.3)  |
| ≥ Q2                              | 6.0 (-2.7, 14.6)                  | 16.2 (6.2, 25.9)  | 12.5 (0.7, 23.8) |
| <b>Fruits and vegetables</b>      |                                   |                   |                  |
| ≥ Q4                              | 4.5 (2.1, 6.9)                    | 15.0 (10.9, 19.1) | 8.6 (3.3, 13.7)  |
| ≥ Q3                              | 2.9 (-1.8, 7.6)                   | 28.7 (21.5, 35.7) | 16.0 (6.2, 25.4) |
| ≥ Q2                              | 5.5 (-3.2, 14.2)                  | 42.0 (29.5, 53.1) | 18.6 (0.5, 35.4) |
| <b>Oil and condiments</b>         |                                   |                   |                  |
| ≥ Q4                              | -0.02                             | -0.01             | 0.8 (-2.2, 3.8)  |
| ≥ Q3                              | 2.4 (-1.0, 5.7)                   | 12.8 (7.3, 18.2)  | 7.6 (0.2, 14.9)  |
| ≥ Q2                              | 8.0 (0.7, 15.1)                   | 23.7 (12.2, 34.6) | 6.1 (-9.2, 21.1) |
| <b>Candy</b>                      |                                   |                   |                  |
| ≥ Q4                              | 0.8 (-0.8, 2.4)                   | 3.6 (0.8, 6.4)    | 5.3 (1.7, 8.8)   |
| ≥ Q3                              | -0.07                             | 5.0 (0.1, 10.0)   | 1.7 (-4.7, 8.1)  |
| ≥ Q2                              | -0.04                             | 16.3 (4.2, 27.9)  | 7.2 (-7.6, 21.7) |

| <b>Beverages</b>             |                  |                   |                   |
|------------------------------|------------------|-------------------|-------------------|
| ≥ Q4                         | -0.01            | -0.18             | 4.2 (1.3, 7.2)    |
| ≥ Q3                         | 4.7 (2.0, 7.4)   | -0.07             | 14.0 (8.0, 19.9)  |
| ≥ Q2                         | 10.1 (4.7, 15.4) | 5.6 (-4.2, 15.4)  | 26.1 (13.1, 33.6) |
| <b>Eggs and egg products</b> |                  |                   |                   |
| ≥ Q4                         | 4.9 (3.2, 6.6)   | 1.9 (-0.9, 4.8)   | 6.9 (3.1, 10.7)   |
| ≥ Q3                         | 4.4 (1.9, 6.9)   | 1.5 (-2.9, 5.8)   | 4.0 (-0.1.6, 9.5) |
| ≥ Q2                         | 11.7 (5.7, 17.5) | 23.9 (14.1, 33.2) | 22.4 (10.1, 34.1) |
| <b>Soup</b>                  |                  |                   |                   |
| ≥ Q4                         | 0.2 (-1.3, 1.6)  | 1.3 (-1.2, 3.9)   | -0.06             |
| ≥ Q3                         | 0.8 (-2.3, 3.9)  | 9.2 (3.9, 14.3)   | -0.08             |
| ≥ Q2                         | 2.1 (-2.7, 7.0)  | 16.9 (9.1, 24.4)  | 2.6 (-8.6, 13.6)  |
| <b>Seafood</b>               |                  |                   |                   |
| ≥ Q4                         | -0.04            | 1.2 (-1.1, 3.6)   | 0.7 (-2.3, 3.8)   |
| ≥ Q3                         | 6.3 (2.0, 10.5)  | 30.2 (23.7, 36.5) | 13.3 (4.1, 22.3)  |
| ≥ Q2                         | 4.5 (-4.1, 13.1) | 28.2 (15.0, 40.4) | 4.2 (-13.6, 21.8) |

The model adjusted for age (<65, ≥65), gender (female, male), race (White, others), education (below high school, others), poverty income ratio (0-1.3, >1.3), body mass index (<30, ≥30 kg/m<sup>2</sup>), physical activity (vigorous or moderate, inactive), smoking status (yes, no), drinking status (yes, no), marital status (never, others), energy (low, high) and cancer (yes, no).

Abbreviations: AGEs, advanced glycation end products; PAR, population attributable risk; CVD, cardiovascular disease.



**Table S4. Association of Quartiles of Total AGEs Score with All-cause, CVD, and Cancer Mortality Stratified by Traditional Risk Factors**

| Lifestyle Factors          | Subgroups   | N     | HR (95% CI)        |                         |                         |                         | $P_{\text{trend}}$ | $P_{\text{interaction}}$ |
|----------------------------|-------------|-------|--------------------|-------------------------|-------------------------|-------------------------|--------------------|--------------------------|
|                            |             |       | Q1<br>(0.08-12.67) | Q2<br>(12.67-24.34)     | Q3<br>(24.34-39.21)     | Q4<br>(39.21-114.61)    |                    |                          |
| <b>All-cause mortality</b> |             |       |                    |                         |                         |                         |                    |                          |
| Age                        | <60         | 15065 | 1.00 (ref.)        | 0.72 (0.50-1.06)        | 0.86 (0.64-1.18)        | 1.13 (0.79-1.62)        | 0.1532             | 0.6213                   |
|                            | ≥60         | 7059  | 1.00 (ref.)        | 1.12 (0.93-1.34)        | 1.13 (0.92-1.39)        | <b>1.22 (1.00-1.49)</b> | <b>0.0448</b>      |                          |
| Sex                        | Female      | 11688 | 1.00 (ref.)        | 1.03 (0.74-1.44)        | 1.03 (0.78-1.37)        | 1.18 (0.92-1.51)        | 0.0816             | 0.2785                   |
|                            | Male        | 10436 | 1.00 (ref.)        | 0.81 (0.62-1.06)        | 0.94 (0.74-1.20)        | 0.99 (0.76-1.30)        | 0.4582             |                          |
| BMI                        | <30         | 15961 | 1.00 (ref.)        | 0.95 (0.71-1.27)        | 0.95 (0.72,1.24)        | 1.16 (0.90-1.50)        | 0.0701             | 0.9777                   |
|                            | ≥30         | 6064  | 1.00 (ref.)        | 0.87 (0.64-1.17)        | 1.12 (0.80-1.56)        | 1.00 (0.76-1.32)        | 0.5403             |                          |
| Smoke                      | Non-smoker  | 10897 | 1.00 (ref.)        | 1.05 (0.73-1.53)        | 1.08 (0.77-1.51)        | 1.11 (0.83-1.49)        | 0.3610             | 0.7275                   |
|                            | Smoker      | 10668 | 1.00 (ref.)        | 0.84 (0.64-1.09)        | 0.95 (0.75-1.19)        | 1.07 (0.86,1.32)        | 0.1094             |                          |
| Alcohol                    | No drinking | 17430 | 1.00 (ref.)        | 0.97 (0.77-1.23)        | 1.06 (0.87-1.30)        | 1.16 (0.96-1.41)        | 0.0114             | 0.4352                   |
|                            | Drinking    | 4694  | 1.00 (ref.)        | 0.73 (0.47-1.13)        | 0.81 (0.52-1.21)        | 0.91 (0.63-1.31)        | 0.9099             |                          |
| Physical activity          | Active      | 15008 | 1.00 (ref.)        | 0.87 (0.64-1.15)        | 0.96 (0.72-1.25)        | 1.02 (0.79-1.28)        | 0.3489             | 0.5624                   |
|                            | Inactive    | 6949  | 1.00 (ref.)        | 0.98 (0.75-1.28)        | 1.02 (0.81-1.28)        | 1.18 (0.94-1.49)        | 0.1094             |                          |
| <b>CVD mortality</b>       |             |       |                    |                         |                         |                         |                    |                          |
| Age                        | <60         | 15065 | 1.00 (ref.)        | 0.94 (0.53-1.66)        | 1.31 (0.78-2.19)        | 1.44 (0.82-2.54)        | 0.0525             | <b>0.0322</b>            |
|                            | ≥60         | 7059  | 1.00 (ref.)        | <b>1.34 (0.93-1.92)</b> | <b>2.12 (1.45-3.09)</b> | <b>2.43 (1.67-3.52)</b> | <b>&lt;0.0001</b>  |                          |
| Sex                        | Female      | 11688 | 1.00 (ref.)        | 1.52 (0.89-2.59)        | <b>2.76 (1.47-4.50)</b> | <b>2.76 (1.64-4.66)</b> | <b>&lt;0.0001</b>  | <b>0.0127</b>            |
|                            | Male        | 10436 | 1.00 (ref.)        | 0.88 (0.59-1.31)        | 1.28 (0.84-1.95)        | 1.40 (0.93-2.11)        | <b>0.0193</b>      |                          |
| BMI                        | <30         | 15961 | 1.00 (ref.)        | 1.08 (0.76-1.54)        | <b>1.69 (1.15-2.48)</b> | <b>2.04 (1.45-2.87)</b> | <b>&lt;0.0001</b>  | 0.4248                   |
|                            | ≥30         | 6064  | 1.00 (ref.)        | 1.12 (0.69-1.83)        | <b>1.82 (1.16-2.86)</b> | 1.55 (0.91-2.59)        | <b>0.0253</b>      |                          |
| Smoke                      | Non-smoker  | 10897 | 1.00 (ref.)        | 0.95 (0.56-1.63)        | 1.83 (0.99-3.40)        | <b>2.05 (1.10-3.83)</b> | <b>0.0018</b>      | 0.2627                   |
|                            | Smoker      | 10668 | 1.00 (ref.)        | 1.18 (0.83-1.66)        | <b>1.67 (1.09-2.54)</b> | <b>1.72 (1.18-2.51)</b> | <b>0.0006</b>      |                          |
| Alcohol                    | No drinking | 17430 | 1.00 (ref.)        | 1.17 (0.82-1.67)        | <b>1.80 (1.27-2.54)</b> | <b>2.03 (1.45-2.86)</b> | <b>&lt;0.0001</b>  | 0.2944                   |

|                         |             |       |             |                  |                         |                         |               |        |
|-------------------------|-------------|-------|-------------|------------------|-------------------------|-------------------------|---------------|--------|
|                         | Drinking    | 4694  | 1.00 (ref.) | 0.88 (0.49-1.59) | 1.46 (0.72-2.94)        | 1.31 (0.72-2.40)        | 0.1543        |        |
| Physical activity       | Active      | 15008 | 1.00 (ref.) | 0.99 (0.63-1.55) | <b>1.89 (1.12-3.20)</b> | <b>1.80 (1.11-2.94)</b> | <b>0.0004</b> | 0.9444 |
|                         | Inactive    | 6949  | 1.00 (ref.) | 1.27 (0.90-1.79) | 1.42 (0.99-2.05)        | <b>1.97 (1.40-2.76)</b> | <b>0.0002</b> |        |
| <b>Cancer mortality</b> |             |       |             |                  |                         |                         |               |        |
| Age                     | <60         | 15065 | 1.00 (ref.) | 0.98 (0.49-1.93) | 1.29 (0.70-2.37)        | 1.58 (0.88-2.84)        | 0.0233        | 0.0649 |
|                         | ≥60         | 7059  | 1.00 (ref.) | 1.06 (0.60-1.87) | 0.78 (0.54-1.14)        | 0.90 (0.59-1.36)        | 0.2415        |        |
| Sex                     | Female      | 11688 | 1.00 (ref.) | 1.26 (0.67-2.35) | 0.92 (0.58-1.45)        | 1.10 (0.72-1.68)        | 0.8762        | 0.3702 |
|                         | Male        | 10436 | 1.00 (ref.) | 0.79 (0.45-1.40) | 0.97 (0.61-1.53)        | 1.03 (0.64-1.65)        | 0.4164        |        |
| BMI                     | <30         | 15961 | 1.00 (ref.) | 1.27 (0.72-2.25) | 1.05 (0.65-1.70)        | 1.30 (0.84-2.02)        | 0.2360        | 0.8794 |
|                         | ≥30         | 6064  | 1.00 (ref.) | 0.69 (0.35-1.35) | 0.91 (0.49-1.68)        | 0.81 (0.45-1.46)        | 0.7488        |        |
| Smoke                   | Non-smoker  | 10897 | 1.00 (ref.) | 1.10 (0.56-2.15) | 0.97 (0.53-1.78)        | 1.01 (0.60-1.70)        | 0.8526        | 0.4077 |
|                         | Smoker      | 10668 | 1.00 (ref.) | 0.96 (0.52-1.76) | 0.94 (0.61-1.46)        | 1.08 (0.71-1.63)        | 0.4075        |        |
| Alcohol                 | No drinking | 17430 | 1.00 (ref.) | 0.94 (0.57-1.53) | 0.89 (0.62-1.29)        | 0.99 (0.70-1.41)        | 0.9323        | 0.2569 |
|                         | Drinking    | 4694  | 1.00 (ref.) | 1.18 (0.46-3.07) | 1.09 (0.49-2.45)        | 1.32 (0.57-3.05)        | 0.5251        |        |
| Physical activity       | Active      | 15008 | 1.00 (ref.) | 1.23 (0.61-2.48) | 1.10 (0.61-1.97)        | 1.27 (0.73-2.22)        | 0.4001        | 0.4091 |
|                         | Inactive    | 6949  | 1.00 (ref.) | 0.79 (0.50-1.24) | 0.84 (0.51-1.38)        | 0.85 (0.51-1.42)        | 0.8218        |        |

The weighted Cox proportional hazard regression model adjusted for age (continuous), gender (female, male), race (Non-Hispanic White, Non-Hispanic Black, Mexican American and others), education (below high school, high school, college or above), marital status (married or living with partner, divorced or separated or widowed, never), poverty income ratio (0-1.30, 1.31-3.50, >3.50), body mass index (<30, ≥30 kg/m<sup>2</sup>), physical activity (active, inactive), smoking status (non-smoker, smoker), drinking status (no drinking, drinking), energy (continuous) and cancer (yes, no).

$P_{\text{trend}}$  was calculated by assigning the categorical AGEs score as a continuous variable.

$P_{\text{interaction}}$  was calculated by adding the term of “AGEs score × Lifestyle factors” in the weighted Cox proportional hazard regression model.

Abbreviations: BMI, body mass index; HR, hazard ratio; CVD, cardiovascular disease; CI, confidence interval.

**Table S5. Association of Quartiles of Meat-derived AGEs Score with All-cause, CVD, and Cancer Mortality Stratified by Traditional Risk Factors**

| Lifestyle Factors          | Subgroups   | N     | HR (95% CI)       |                         |                         |                         | <i>P</i> <sub>trend</sub> | <i>P</i> <sub>interaction</sub> |
|----------------------------|-------------|-------|-------------------|-------------------------|-------------------------|-------------------------|---------------------------|---------------------------------|
|                            |             |       | Q1<br>(0.06-0.65) | Q2<br>(0.65-2.43)       | Q3<br>(2.43-5.39)       | Q4<br>(5.39-94.70)      |                           |                                 |
| <b>All-cause mortality</b> |             |       |                   |                         |                         |                         |                           |                                 |
| Age                        | <60         | 15065 | 1.00 (ref.)       | 0.99 (0.63-1.58)        | 0.99 (0.63-1.57)        | 1.00 (0.66-1.51)        | 0.9969                    | 0.7055                          |
|                            | ≥60         | 7059  | 1.00 (ref.)       | 0.99 (0.77-1.27)        | 1.09 (0.92-1.30)        | 1.11 (0.90-1.38)        | 0.1555                    |                                 |
| Sex                        | Female      | 11688 | 1.00 (ref.)       | 1.05 (0.85-1.30)        | 1.00 (0.84-1.19)        | 1.19 (0.97-1.45)        | 0.1456                    | 0.9212                          |
|                            | Male        | 10436 | 1.00 (ref.)       | 1.07 (0.78-1.49)        | 1.29 (0.94-1.77)        | 1.22 (0.90-1.65)        | 0.0979                    |                                 |
| BMI                        | <30         | 15961 | 1.00 (ref.)       | 1.06 (0.83-1.34)        | 1.11 (0.90-1.36)        | 1.17 (0.96-1.43)        | 0.0594                    | 0.1340                          |
|                            | ≥30         | 6064  | 1.00 (ref.)       | 1.04 (0.72-1.50)        | 1.22 (0.88-1.69)        | 1.27 (0.94-1.70)        | 0.0489                    |                                 |
| Smoke                      | Non-smoker  | 10897 | 1.00 (ref.)       | 1.16 (0.91-1.47)        | 1.09 (0.87-1.36)        | 1.13 (0.89-1.44)        | 0.4292                    | <b>0.0429</b>                   |
|                            | Smoker      | 10668 | 1.00 (ref.)       | 1.00 (0.75-1.33)        | 1.19 (0.95-1.49)        | <b>1.29 (1.03-1.62)</b> | <b>0.0023</b>             |                                 |
| Alcohol                    | No drinking | 17430 | 1.00 (ref.)       | 1.16 (0.94-1.43)        | <b>1.27 (1.04-1.55)</b> | <b>1.29 (1.07-1.56)</b> | <b>0.0030</b>             | 0.4290                          |
|                            | Drinking    | 4694  | 1.00 (ref.)       | 0.81 (0.52-1.24)        | 0.78 (0.54-1.13)        | 0.98 (0.65-1.46)        | 0.96665                   |                                 |
| Physical activity          | Active      | 15008 | 1.00 (ref.)       | 1.05 (0.80-1.38)        | 1.21 (0.94-1.57)        | 1.26 (0.99-1.62)        | 0.0123                    | 0.1615                          |
|                            | Inactive    | 6949  | 1.00 (ref.)       | 1.10 (0.84-1.43)        | 1.04 (0.83-1.29)        | 1.13 (0.90-1.41)        | 0.2140                    |                                 |
| <b>CVD mortality</b>       |             |       |                   |                         |                         |                         |                           |                                 |
| Age                        | <60         | 15065 | 1.00 (ref.)       | 0.97 (0.48-1.97)        | 1.46 (0.78-2.74)        | 1.31 (0.71-2.42)        | 0.1929                    | <b>0.0069</b>                   |
|                            | ≥60         | 7059  | 1.00 (ref.)       | 1.40 (0.98-1.99)        | <b>1.79 (1.24-2.58)</b> | <b>1.77 (1.23-2.54)</b> | <b>0.0006</b>             |                                 |
| Sex                        | Female      | 11688 | 1.00 (ref.)       | <b>1.89 (1.17-3.03)</b> | <b>2.14 (1.27-3.60)</b> | <b>2.50 (1.48-4.22)</b> | <b>0.0002</b>             | 0.0802                          |
|                            | Male        | 10436 | 1.00 (ref.)       | 1.19 (0.75-1.90)        | <b>1.81 (1.11-2.98)</b> | <b>1.54 (1.03-2.30)</b> | <b>0.0110</b>             |                                 |
| BMI                        | <30         | 15961 | 1.00 (ref.)       | 1.46 (1.02-2.07)        | <b>1.97 (1.30-3.00)</b> | <b>1.83 (1.20-2.79)</b> | <b>0.0018</b>             | 0.1214                          |
|                            | ≥30         | 6064  | 1.00 (ref.)       | 1.32 (0.78-2.21)        | <b>1.73 (1.01-2.95)</b> | <b>1.99 (1.19-3.32)</b> | <b>0.0029</b>             |                                 |
| Smoke                      | Non-smoker  | 10897 | 1.00 (ref.)       | 1.55 (0.95-2.53)        | <b>1.84 (1.13-2.99)</b> | <b>1.94 (1.22-3.08)</b> | <b>0.0019</b>             | 0.4765                          |
|                            | Smoker      | 10668 | 1.00 (ref.)       | 1.36 (0.92-2.00)        | <b>1.99 (1.29-3.05)</b> | <b>1.91 (1.25-2.92)</b> | <b>0.0008</b>             |                                 |
| Alcohol                    | No drinking | 17430 | 1.00 (ref.)       | <b>1.40 (1.00-1.97)</b> | <b>1.88 (1.29-2.74)</b> | <b>1.82 (1.26-2.63)</b> | <b>0.0005</b>             | 0.1503                          |

|                         |             |       |             |                         |                         |                         |                   |               |
|-------------------------|-------------|-------|-------------|-------------------------|-------------------------|-------------------------|-------------------|---------------|
|                         | Drinking    | 4694  | 1.00 (ref.) | 1.57 (0.66-3.75)        | <b>2.14 (1.09-4.19)</b> | <b>2.33 (1.17-4.65)</b> | <b>0.0025</b>     |               |
| Physical activity       | Active      | 15008 | 1.00 (ref.) | <b>1.70 (1.05-2.74)</b> | <b>2.63 (1.59-4.35)</b> | <b>2.41 (1.48-3.93)</b> | <b>&lt;0.0001</b> | 0.1392        |
|                         | Inactive    | 6949  | 1.00 (ref.) | 1.26 (0.82-1.89)        | 1.28 (0.88-1.87)        | 1.51 (0.94-2.45)        | 0.0716            |               |
| <b>Cancer mortality</b> |             |       |             |                         |                         |                         |                   |               |
| Age                     | <60         | 15065 | 1.00 (ref.) | 0.91 (0.44-1.90)        | 1.18 (0.59-2.35)        | 1.27 (0.64-2.50)        | 0.2236            | 0.2903        |
|                         | ≥60         | 7059  | 1.00 (ref.) | 1.10 (0.75-1.61)        | 1.19 (0.81-1.76)        | 1.09 (0.75-1.57)        | 0.5891            |               |
| Sex                     | Female      | 11688 | 1.00 (ref.) | 1.10 (0.65-1.87)        | 1.23 (0.73-2.07)        | 1.42 (0.91-2.21)        | 0.0652            | 0.6488        |
|                         | Male        | 10436 | 1.00 (ref.) | 1.04 (0.59-1.83)        | 1.26 (0.71-2.23)        | 1.24 (0.76-2.02)        | 0.2582            |               |
| BMI                     | <30         | 15961 | 1.00 (ref.) | 1.06 (0.79-1.42)        | 1.24 (0.89-1.73)        | 1.25 (0.91-1.72)        | 0.0964            | 0.8869        |
|                         | ≥30         | 6064  | 1.00 (ref.) | 1.03 (0.57-1.85)        | 1.15 (0.55-2.38)        | 1.37 (0.82-2.27)        | 0.1771            |               |
| Smoke                   | Non-smoker  | 10897 | 1.00 (ref.) | 1.01 (0.59-1.75)        | 1.38 (0.73-2.60)        | 1.18 (0.71-1.96)        | 0.3530            | 0.6179        |
|                         | Smoker      | 10668 | 1.00 (ref.) | 1.08 (0.70-1.65)        | 1.16 (0.78-1.73)        | 1.39 (0.97-2.00)        | 0.0311            |               |
| Alcohol                 | No drinking | 17430 | 1.00 (ref.) | 1.29 (0.91-1.81)        | <b>1.49 (1.02-2.18)</b> | <b>1.50 (1.10-2.05)</b> | <b>0.0061</b>     | 0.5136        |
|                         | Drinking    | 4694  | 1.00 (ref.) | 0.53 (0.24-1.16)        | 0.59 (0.31-1.10)        | 0.75 (0.44-1.30)        | 0.6828            |               |
| Physical activity       | Active      | 15008 | 1.00 (ref.) | <b>1.62 (1.04-2.52)</b> | <b>1.87 (1.13-3.08)</b> | <b>1.89 (1.28-2.79)</b> | <b>0.0008</b>     | <b>0.0462</b> |
|                         | Inactive    | 6949  | 1.00 (ref.) | 0.62 (0.41-0.95)        | 0.70 (0.46-1.06)        | 0.84 (0.58-1.21)        | 0.4923            |               |

The weighted Cox proportional hazard regression model adjusted for age (continuous), gender (female, male), race (Non-Hispanic White, Non-Hispanic Black, Mexican American and others), education (below high school, high school, college or above), marital status (married or living with partner, divorced or separated or widowed, never), poverty income ratio (0-1.30, 1.31-3.50, >3.50), body mass index (<30, ≥30 kg/m<sup>2</sup>), physical activity (active, inactive), smoking status (non-smoker, smoker), drinking status (no drinking, drinking), energy (continuous) and cancer (yes, no).

$P_{\text{trend}}$  was calculated by assigning the categorical AGEs score as a continuous variable.

$P_{\text{interaction}}$  was calculated by adding the term of “AGEs score × Lifestyle factors” in the weighted Cox proportional hazard regression model.

Abbreviations: BMI, body mass index; HR, hazard ratio; CVD, cardiovascular disease; CI, confidence interval.

**Table S6. Association of Quartiles of Baked-derived AGEs Score with All-cause, CVD, and Cancer Mortality Stratified by Traditional Risk Factors**

| Lifestyle Factors          | Subgroups   | N     | HR (95% CI)       |                         |                         |                         | <i>P</i> <sub>trend</sub> | <i>P</i> <sub>interaction</sub> |
|----------------------------|-------------|-------|-------------------|-------------------------|-------------------------|-------------------------|---------------------------|---------------------------------|
|                            |             |       | Q1<br>(0.07-0.69) | Q2<br>(0.69-4.13)       | Q3<br>(4.13-10.96)      | Q4<br>(10.96-81.31)     |                           |                                 |
| <b>All-cause mortality</b> |             |       |                   |                         |                         |                         |                           |                                 |
| Age                        | <60         | 15065 | 1.00 (ref.)       | 0.82 (0.55-1.21)        | 0.83 (0.60-1.14)        | 0.98 (0.68-1.42)        | 0.8002                    | <b>0.0340</b>                   |
|                            | ≥60         | 7059  | 1.00 (ref.)       | 0.96 (0.72-1.29)        | 1.11 (0.92-1.32)        | <b>1.38 (1.10-1.73)</b> | <b>0.0001</b>             |                                 |
| Sex                        | Female      | 11688 | 1.00 (ref.)       | 1.12 (0.82-1.52)        | 1.17 (0.85-1.60)        | <b>1.46 (1.10-1.94)</b> | <b>0.0081</b>             | <b>0.0438</b>                   |
|                            | Male        | 10436 | 1.00 (ref.)       | 0.77 (0.56-1.06)        | 0.86 (0.68-1.09)        | 1.01 (0.78-1.32)        | 0.3955                    |                                 |
| BMI                        | <30         | 15961 | 1.00 (ref.)       | 0.88 (0.67-1.15)        | 0.94 (0.74-1.19)        | 1.18 (0.93-1.49)        | 0.0523                    | 0.2960                          |
|                            | ≥30         | 6064  | 1.00 (ref.)       | 1.01 (0.66-1.54)        | 1.13 (0.80-1.57)        | 1.31 (0.95-1.81)        | 0.0515                    |                                 |
| Smoke                      | Non-smoker  | 10897 | 1.00 (ref.)       | 0.87 (0.64-1.17)        | 0.99 (0.73-1.33)        | 1.18 (0.88-1.59)        | 0.0783                    | 0.7778                          |
|                            | Smoker      | 10668 | 1.00 (ref.)       | 0.93 (0.68-1.29)        | 0.99 (0.80-1.24)        | 1.20 (0.95-1.51)        | 0.0275                    |                                 |
| Alcohol                    | No drinking | 17430 | 1.00 (ref.)       | 0.97 (0.73-1.30)        | 1.05 (0.85-1.29)        | <b>1.30 (1.05-1.60)</b> | <b>0.0051</b>             | 0.4489                          |
|                            | Drinking    | 4694  | 1.00 (ref.)       | 0.79 (0.47-1.35)        | 0.86 (0.55-1.34)        | 0.99 (0.63-1.54)        | 0.8424                    |                                 |
| Physical activity          | Active      | 15008 | 1.00 (ref.)       | 0.71 (0.50-1.02)        | 0.91(0.70-1.18)         | 1.05 (0.82-1.35)        | 0.1244                    | 0.7540                          |
|                            | Inactive    | 6949  | 1.00 (ref.)       | 1.22 (0.96-1.56)        | 1.10 (0.86-1.41)        | <b>1.39 (1.10-1.75)</b> | <b>0.0146</b>             |                                 |
| <b>CVD mortality</b>       |             |       |                   |                         |                         |                         |                           |                                 |
| Age                        | <60         | 15065 | 1.00 (ref.)       | 0.72 (0.37-1.40)        | 1.02 (0.57-1.82)        | 1.29 (0.77-2.17)        | 0.1063                    | 0.2362                          |
|                            | ≥60         | 7059  | 1.00 (ref.)       | 1.16 (0.78-1.74)        | <b>1.91 (1.37-2.64)</b> | <b>2.74 (1.89-3.96)</b> | <b>&lt;0.0001</b>         |                                 |
| Sex                        | Female      | 11688 | 1.00 (ref.)       | <b>1.98 (1.12-3.48)</b> | <b>2.93 (1.94-4.43)</b> | <b>3.99 (2.59-6.14)</b> | <b>&lt;0.0001</b>         | <b>0.0005</b>                   |
|                            | Male        | 10436 | 1.00 (ref.)       | 0.72 (0.44-1.18)        | 1.11 (0.76-1.63)        | <b>1.57 (1.06-2.32)</b> | <b>0.0034</b>             |                                 |
| BMI                        | <30         | 15961 | 1.00 (ref.)       | 1.28 (0.82-1.98)        | <b>1.64 (1.12-2.40)</b> | <b>2.38 (1.61-3.52)</b> | <b>&lt;0.0001</b>         | 0.5614                          |
|                            | ≥30         | 6064  | 1.00 (ref.)       | 0.62 (0.35-1.10)        | 1.38 (0.83-2.29)        | <b>1.70 (1.09-2.65)</b> | <b>0.0005</b>             |                                 |
| Smoke                      | Non-smoker  | 10897 | 1.00 (ref.)       | 1.12 (0.65-1.93)        | 1.76 (0.99-3.11)        | <b>2.45 (1.40-4.29)</b> | <b>&lt;0.0001</b>         | 0.3521                          |
|                            | Smoker      | 10668 | 1.00 (ref.)       | 0.94 (0.57-1.54)        | 1.44 (0.99-2.12)        | <b>1.94 (1.32-2.85)</b> | <b>&lt;0.0001</b>         |                                 |
| Alcohol                    | No drinking | 17430 | 1.00 (ref.)       | 1.16 (0.75-1.81)        | <b>1.77 (1.29-2.42)</b> | <b>2.50 (1.83-3.43)</b> | <b>&lt;0.0001</b>         | 0.1556                          |

|                         |             |       |             |                  |                   |                         |                   |        |
|-------------------------|-------------|-------|-------------|------------------|-------------------|-------------------------|-------------------|--------|
|                         | Drinking    | 4694  | 1.00 (ref.) | 0.69 (0.30-1.58) | 0.99 (0.50-2.01)  | 1.23 (0.62-2.43)        | 0.2664            |        |
| Physical activity       | Active      | 15008 | 1.00 (ref.) | 1.02 (0.55-1.89) | 1.43 (0.86-2.40)  | <b>1.98 (1.24-3.14)</b> | <b>&lt;0.0001</b> | 0.6182 |
|                         | Inactive    | 6949  | 1.00 (ref.) | 1.07 (0.64-1.79) | 1.46 (0.93-2.28)  | <b>1.86 (1.20-2.86)</b> | <b>0.0006</b>     |        |
| <b>Cancer mortality</b> |             |       |             |                  |                   |                         |                   |        |
| Age                     | <60         | 15065 | 1.00 (ref.) | 0.65 (0.37-1.16) | 1.20 (0.65-2.21)  | 1.50 (0.83-2.74)        | 0.0238            | 0.2767 |
|                         | ≥60         | 7059  | 1.00 (ref.) | 1.15 (0.63-2.09) | 1.09 (0.75-1.59)  | 1.41 (0.89-2.23)        | 0.0702            |        |
| Sex                     | Female      | 11688 | 1.00 (ref.) | 0.93 (0.41-2.09) | 1.04 (0.55-1.99)  | 1.45 (0.78-2.68)        | 0.1235            | 0.7762 |
|                         | Male        | 10436 | 1.00 (ref.) | 1.02 (0.53-1.96) | 1.25 (0.75-2.07)  | 1.47 (0.87-2.48)        | 0.0342            |        |
| BMI                     | <30         | 15961 | 1.00 (ref.) | 0.85 (0.47-1.56) | 1.06 (0.71-1.58)  | 1.33 (0.86-2.04)        | 0.0320            | 0.7419 |
|                         | ≥30         | 6064  | 1.00 (ref.) | 1.12 (0.54-2.35) | 1.21 (0.59-2.44)  | 1.67 (0.76-3.65)        | 0.1313            |        |
| Smoke                   | Non-smoker  | 10897 | 1.00 (ref.) | 0.71 (0.28-1.78) | 0.79 (0.36-1.75)  | 1.03 (0.47-2.27)        | 0.7064            | 0.2902 |
|                         | Smoker      | 10668 | 1.00 (ref.) | 1.15 (0.69-1.89) | 1.36 (0.90-2.04)  | <b>1.70 (1.11-2.60)</b> | <b>0.0031</b>     |        |
| Alcohol                 | No drinking | 17430 | 1.00 (ref.) | 1.06 (0.63-1.79) | 1.02 (0.66--1.58) | 1.40 (0.88-2.21)        | 0.0610            | 0.2514 |
|                         | Drinking    | 4694  | 1.00 (ref.) | 0.55 (0.15-2.04) | 1.43 (0.54-3.79)  | 1.51 (0.51-4.52)        | 0.1790            |        |
| Physical activity       | Active      | 15008 | 1.00 (ref.) | 0.83 (0.43-1.62) | 1.16 (0.76-1.77)  | 1.39 (0.88-2.21)        | 0.0162            | 0.5983 |
|                         | Inactive    | 6949  | 1.00 (ref.) | 1.19 (0.68-2.09) | 0.99 (0.54-1.82)  | 1.44 (0.83-2.51)        | 0.2503            |        |

The weighted Cox proportional hazard regression model adjusted for age (continuous), gender (female, male), race (Non-Hispanic White, Non-Hispanic Black, Mexican American and others), education (below high school, high school, college or above), marital status (married or living with partner, divorced or separated or widowed, never), poverty income ratio (0-1.30, 1.31-3.50, >3.50), body mass index (<30, ≥30 kg/m<sup>2</sup>), physical activity (active, inactive), smoking status (non-smoker, smoker), drinking status (no drinking, drinking), energy (continuous) and cancer (yes, no).

$P_{\text{trend}}$  was calculated by assigning the categorical AGEs score as a continuous variable.

$P_{\text{interaction}}$  was calculated by adding the term of “AGEs score × Lifestyle factors” in the weighted Cox proportional hazard regression model.

Abbreviations: BMI, body mass index; HR, hazard ratio; CVD, cardiovascular disease; CI, confidence interval.

**Table S7. Association of Quartiles of Potatoes-derived AGEs Score with All-cause, CVD, and Cancer Mortality Stratified by Traditional Risk Factors**

| Lifestyle Factors          | Subgroups   | N     | HR (95% CI)       |                         |                         |                         | <i>P</i> <sub>trend</sub> | <i>P</i> <sub>interaction</sub> |
|----------------------------|-------------|-------|-------------------|-------------------------|-------------------------|-------------------------|---------------------------|---------------------------------|
|                            |             |       | Q1<br>(0.07-0.11) | Q2<br>(0.11-0.27)       | Q3<br>(0.27-0.49)       | Q4<br>(0.49-5.18)       |                           |                                 |
| <b>All-cause mortality</b> |             |       |                   |                         |                         |                         |                           |                                 |
| Age                        | <60         | 15065 | 1.00 (ref.)       | 0.92 (0.64-1.32)        | 0.91 (0.66-1.24)        | 0.81 (0.60-1.10)        | 0.1424                    | <b>0.0216</b>                   |
|                            | ≥60         | 7059  | 1.00 (ref.)       | 1.10 (0.91-1.34)        | <b>1.28 (1.05-1.56)</b> | 1.19 (0.96-1.48)        | <b>0.0417</b>             |                                 |
| Sex                        | Female      | 11688 | 1.00 (ref.)       | 1.18 (0.95-1.48)        | <b>1.31 (1.8-1.58)</b>  | <b>1.25 (1.01-1.53)</b> | <b>0.0144</b>             | 0.1522                          |
|                            | Male        | 10436 | 1.00 (ref.)       | 1.03 (0.83-1.25)        | 1.02 (0.83-1.25)        | 1.01 (0.75-1.34)        | 0.9803                    |                                 |
| BMI                        | <30         | 15961 | 1.00 (ref.)       | 0.98 (0.80-1.21)        | 1.05 (0.91-1.22)        | 1.05 (0.86-1.29)        | 0.3511                    | 0.5268                          |
|                            | ≥30         | 6064  | 1.00 (ref.)       | 1.23 (0.81-1.86)        | 1.26 (0.81-1.86)        | 1.15 (0.77-1.71)        | 0.5092                    |                                 |
| Smoke                      | Non-smoker  | 10897 | 1.00 (ref.)       | 1.01 (0.80-1.26)        | 1.00 (0.82-1.22)        | 1.10 (0.92-1.31)        | 0.2845                    | 0.9540                          |
|                            | Smoker      | 10668 | 1.00 (ref.)       | 1.07 (0.85-1.34)        | 1.18 (0.94-1.47)        | 1.08 (0.85-1.37)        | 0.3678                    |                                 |
| Alcohol                    | No drinking | 17430 | 1.00 (ref.)       | <b>1.27 (1.03-1.57)</b> | <b>1.27 (1.07-1.50)</b> | <b>1.25 (1.02-1.54)</b> | <b>0.0467</b>             | 0.1511                          |
|                            | Drinking    | 4694  | 1.00 (ref.)       | 0.66 (0.48-0.91)        | 0.81 (0.58-1.15)        | 0.75 (0.53-1.06)        | 0.3129                    |                                 |
| Physical activity          | Active      | 15008 | 1.00 (ref.)       | 1.01 (0.80-1.28)        | 1.03 (0.81-1.31)        | 1.05 (0.83-1.33)        | 0.5893                    | 0.9748                          |
|                            | Inactive    | 6949  | 1.00 (ref.)       | 1.09 (0.84-1.42)        | 1.21 (0.95-1.53)        | 1.08(0.82-1.42)         | 0.4323                    |                                 |
| <b>CVD mortality</b>       |             |       |                   |                         |                         |                         |                           |                                 |
| Age                        | <60         | 15065 | 1.00 (ref.)       | 0.85 (0.44-1.66)        | 0.91 (0.50-1.65)        | 0.75 (0.37-1.51)        | 0.4347                    | <b>0.0173</b>                   |
|                            | ≥60         | 7059  | 1.00 (ref.)       | <b>1.53 (1.06-2.21)</b> | <b>1.89 (1.34-2.67)</b> | <b>1.76 (1.22-2.53)</b> | <b>0.0008</b>             |                                 |
| Sex                        | Female      | 11688 | 1.00 (ref.)       | 1.66 (0.87-3.18)        | <b>1.91 (1.05-3.48)</b> | <b>1.73 (1.02-2.91)</b> | <b>0.0125</b>             | 0.2241                          |
|                            | Male        | 10436 | 1.00 (ref.)       | 1.27 (0.82-1.98)        | 1.36 (0.96-1.91)        | 1.34 (0.85-2.11)        | 0.1803                    |                                 |
| BMI                        | <30         | 15961 | 1.00 (ref.)       | 1.24 (0.81-1.91)        | 1.37 (0.93-2.01)        | 1.37 (0.91-2.05)        | 0.0562                    | 0.5717                          |
|                            | ≥30         | 6064  | 1.00 (ref.)       | 1.43 (0.90-2.30)        | 1.78 (1.19-2.67)        | 1.42 (0.89-2.26)        | 0.0968                    |                                 |
| Smoke                      | Non-smoker  | 10897 | 1.00 (ref.)       | 1.23 (0.64-2.39)        | 1.33 (0.72-2.46)        | 1.47 (0.81-2.64)        | 0.1253                    | 0.7174                          |
|                            | Smoker      | 10668 | 1.00 (ref.)       | 1.40 (0.92-2.12)        | 1.61 (1.13-2.29)        | 1.38 (0.92-2.07)        | 0.0871                    |                                 |
| Alcohol                    | No drinking | 17430 | 1.00 (ref.)       | 1.39 (0.94-2.08)        | <b>1.64 (1.13-2.36)</b> | <b>1.52 (1.00-2.32)</b> | <b>0.0252</b>             | 0.2697                          |

|                         |             |       |             |                  |                         |                         |               |               |
|-------------------------|-------------|-------|-------------|------------------|-------------------------|-------------------------|---------------|---------------|
|                         | Drinking    | 4694  | 1.00 (ref.) | 1.06 (0.48-2.35) | 1.06 (0.56-2.01)        | 0.97 (0.47-2.02)        | 0.8649        |               |
| Physical activity       | Active      | 15008 | 1.00 (ref.) | 1.39(0.85-2.26)  | <b>1.91 (1.29-2.82)</b> | <b>1.80 (1.19-2.73)</b> | <b>0.0001</b> | <b>0.0004</b> |
|                         | Inactive    | 6949  | 1.00 (ref.) | 1.21(0.76-1.93)  | 1.13 (0.74-1.71)        | 0.92 (0.60-1.43)        | 0.5048        |               |
| <b>Cancer mortality</b> |             |       |             |                  |                         |                         |               |               |
| Age                     | <60         | 15065 | 1.00 (ref.) | 1.39 (0.60-3.21) | 1.77 (0.81-3.90)        | 1.33 (0.58-3.05)        | 0.3936        | 0.2430        |
|                         | ≥60         | 7059  | 1.00 (ref.) | 1.39 (0.92-2.11) | 1.37 (0.94-1.99)        | 1.12 (0.75-1.69)        | 0.7078        |               |
| Sex                     | Female      | 11688 | 1.00 (ref.) | 1.42 (0.62-3.22) | 1.39 (0.62-3.11)        | 1.00 (1.06-1.08)        | 0.6915        | 0.3002        |
|                         | Male        | 10436 | 1.00 (ref.) | 1.37 (0.79-2.39) | 1.62 (0.98-2.70)        | 1.45 (0.87-2.42)        | 0.0669        |               |
| BMI                     | <30         | 15961 | 1.00 (ref.) | 1.35 (0.83-2.18) | 1.55 (1.06-2.28)        | 1.27 (0.83-1.96)        | 0.1998        | 0.7261        |
|                         | ≥30         | 6064  | 1.00 (ref.) | 1.29 (0.67-2.45) | 1.25 (0.64-2.43)        | 1.08 (0.59-1.99)        | 0.9679        |               |
| Smoke                   | Non-smoker  | 10897 | 1.00 (ref.) | 1.16 (0.46-2.92) | 0.89 (0.38-2.09)        | 0.90 (0.36-2.22)        | 0.4663        | 0.1839        |
|                         | Smoker      | 10668 | 1.00 (ref.) | 1.44 (0.95-2.21) | 1.84 (1.23-2.75)        | 1.41 (0.88-2.24)        | 0.0756        |               |
| Alcohol                 | No drinking | 17430 | 1.00 (ref.) | 1.45 (0.86-2.44) | 1.39 (0.85-2.25)        | 1.20 (0.71-2.04)        | 0.7006        | 0.2476        |
|                         | Drinking    | 4694  | 1.00 (ref.) | 0.98 (0.47-2.02) | 1.71 (0.82-3.54)        | 1.25 (0.57-2.72)        | 0.2462        |               |
| Physical activity       | Active      | 15008 | 1.00 (ref.) | 1.46 (0.89-2.43) | 1.44 (0.92-2.28)        | 1.27 (0.75-2.28)        | 0.5432        | 0.9525        |
|                         | Inactive    | 6949  | 1.00 (ref.) | 1.18 (0.66-2.10) | 1.57 (0.87-2.84)        | 1.15 (0.65-2.04)        | 0.3982        |               |

The weighted Cox proportional hazard regression model adjusted for age (continuous), gender (female, male), race (Non-Hispanic White, Non-Hispanic Black, Mexican American and others), education (below high school, high school, college or above), marital status (married or living with partner, divorced or separated or widowed, never), poverty income ratio (0-1.30, 1.31-3.50, >3.50), body mass index (<30, ≥30 kg/m<sup>2</sup>), physical activity (active, inactive), smoking status (non-smoker, smoker), drinking status (no drinking, drinking), energy (continuous) and cancer (yes, no).

$P_{\text{trend}}$  was calculated by assigning the categorical AGEs score as a continuous variable.

$P_{\text{interaction}}$  was calculated by adding the term of “AGEs score × Lifestyle factors” in the weighted Cox proportional hazard regression model.

Abbreviations: BMI, body mass index; HR, hazard ratio; CVD, cardiovascular disease; CI, confidence interval.

**Table S8. Smoking and Meat-derived AGEs Score with All-cause Mortality, Physical Activity and Meat-derived AGEs Score with Cancer Mortality, and Physical Activity and Potatoes-derived AGEs Score with CVD Mortality**

| Outcomes            | AGEs Score             | Characteristics |                |
|---------------------|------------------------|-----------------|----------------|
|                     |                        | HR (95% CI)     | HR (95% CI)    |
| All-cause Mortality | Meat and meat products | Non-smoker      | Current-smoker |
|                     |                        | Q1 level        | 1.00 (ref.)    |



|                  |                             |                   |                   |                     |
|------------------|-----------------------------|-------------------|-------------------|---------------------|
|                  |                             | Q2 level          | 1.09 (0.87-1.37)  | 1.36 (1.08-1.71)    |
|                  |                             | Q3 level          | 1.06 (0.86-1.30)  | 1.60 (1.30-1.97)    |
|                  |                             | Q4 level          | 1.07 (0.88-1.31)  | 1.74 (1.46-2.07)    |
| Cancer Mortality | Meat and meat products      | Physically Active |                   | Physically Inactive |
|                  |                             | Q1 level          | 1.00 (ref.)       | 2.14 (1.28-3.59)    |
|                  |                             | Q2 level          | 1.59 (1.02- 2.47) | 1.31 (0.74-2.32)    |
|                  |                             | Q3 level          | 1.83 (1.09-3.09)  | 1.56 (0.98-2.49)    |
|                  |                             | Q4 level          | 1.86 (1.23-2.83)  | 1.94 (1.13-3.35)    |
| CVD Mortality    | Potatoes and their products | Physically Active |                   | Physically Inactive |
|                  |                             | Q1 level          | 1.00 (ref.)       | 1.75 (1.04-2.94)    |
|                  |                             | Q2 level          | 1.37 (0.82-2.29)  | 2.13 (1.34-3.39)    |
|                  |                             | Q3 level          | 1.90 (1.27-2.83)  | 1.91 (1.17-3.10)    |
|                  |                             | Q4 level          | 1.82 (1.18-2.81)  | 1.60 (0.97-2.64)    |

The Weighted Cox proportional hazard regression model was used to perform interaction analysis by added a “lifestyle × AGEs score” term.

The model was adjusted for age (continuous), gender (female, male), race (Non-Hispanic White, Non-Hispanic Black, Mexican American and others), education (below high school, high school, college or above), marital status (married or living with partner, divorced or separated or widowed, never), poverty income ratio (0-1.30, 1.31-3.50, >3.50), body mass index (<30, ≥30 kg/m<sup>2</sup>), physical activity (active, inactive), smoking status (no, yes), drinking status (no, yes), energy (continuous) and cancer (yes, no).

Abbreviations: AGEs, advanced glycation end products.

**Table S9. Estimates for Additive Interaction between Total, Meat-, Baked Food- and Potatoes-derived AGEs Score and Lifestyle Factors in All-cause, CVD, and Cancer Mortality**

| Characteristics                    | Outcomes            | AGEs Score    |                       |               |
|------------------------------------|---------------------|---------------|-----------------------|---------------|
|                                    |                     | RERI          | 95% CI                | P-value       |
| <b>Total AGEs score</b>            |                     |               |                       |               |
| Physically Inactive                | All-cause Mortality | -0.095        | -0.225, 0.036         | 0.1548        |
|                                    | CVD Mortality       | -0.211        | -0.478, 0.056         | 0.1214        |
|                                    | Cancer Mortality    | -0.087        | -0.360, 0.186         | 0.5334        |
| Smoker                             | All-cause Mortality | -0.007        | -0.135, 0.122         | 0.9162        |
|                                    | CVD Mortality       | -0.235        | -0.507, 0.037         | 0.0897        |
|                                    | Cancer Mortality    | 0.197         | -0.117, 0.510         | 0.2188        |
| <b>Meat and meat products</b>      |                     |               |                       |               |
| Physically Inactive                | All-cause Mortality | <b>-0.150</b> | <b>-0.287, -0.014</b> | <b>0.0312</b> |
|                                    | CVD Mortality       | -0.041        | -0.287, 0.205         | 0.7444        |
|                                    | Cancer Mortality    | -0.078        | -0.364, 0.209         | 0.5946        |
| Smoker                             | All-cause Mortality | <b>0.152</b>  | <b>0.035, 0.268</b>   | <b>0.0107</b> |
|                                    | CVD Mortality       | 0.113         | -0.106, 0.332         | 0.3107        |
|                                    | Cancer Mortality    | <b>0.364</b>  | <b>0.068, 0.660</b>   | <b>0.0159</b> |
| <b>Baked products</b>              |                     |               |                       |               |
| Physically Inactive                | All-cause Mortality | -0.082        | -0.232, 0.068         | 0.2851        |
|                                    | CVD Mortality       | -0.056        | -0.361, 0.250         | 0.7212        |
|                                    | Cancer Mortality    | -0.088        | -0.416, 0.239         | 0.5976        |
| Smoker                             | All-cause Mortality | 0.087         | -0.052, 0.226         | 0.2180        |
|                                    | CVD Mortality       | -0.004        | -0.298, 0.291         | 0.9804        |
|                                    | Cancer Mortality    | <b>0.465</b>  | <b>0.155, 0.774</b>   | <b>0.0032</b> |
| <b>Potatoes and their products</b> |                     |               |                       |               |
| Physically Inactive                | All-cause Mortality | 0.018         | -0.090, 0.125         | 0.7471        |
|                                    | CVD Mortality       | -0.121        | -0.324, 0.082         | 0.2420        |

|        |                     |       |               |        |
|--------|---------------------|-------|---------------|--------|
|        | Cancer Mortality    | 0.093 | -0.127, 0.315 | 0.4052 |
| Smoker | All-cause Mortality | 0.068 | -0.037, 0.175 | 0.2050 |
|        | CVD Mortality       | 0.144 | -0.030, 0.318 | 0.1052 |
|        | Cancer Mortality    | 0.251 | -0.013, 0.515 | 0.0628 |

The AGEs score was categorized into binary classification by weighted median. The model took the healthier lifestyle group (i.e., physical active and non-smoker) and lower levels of AGEs score group as the reference group.

Abbreviations: AGEs, advanced glycation end products; RERI, relative excess risk due to interaction; CI, confidence interval; CVD, cardiovascular disease.

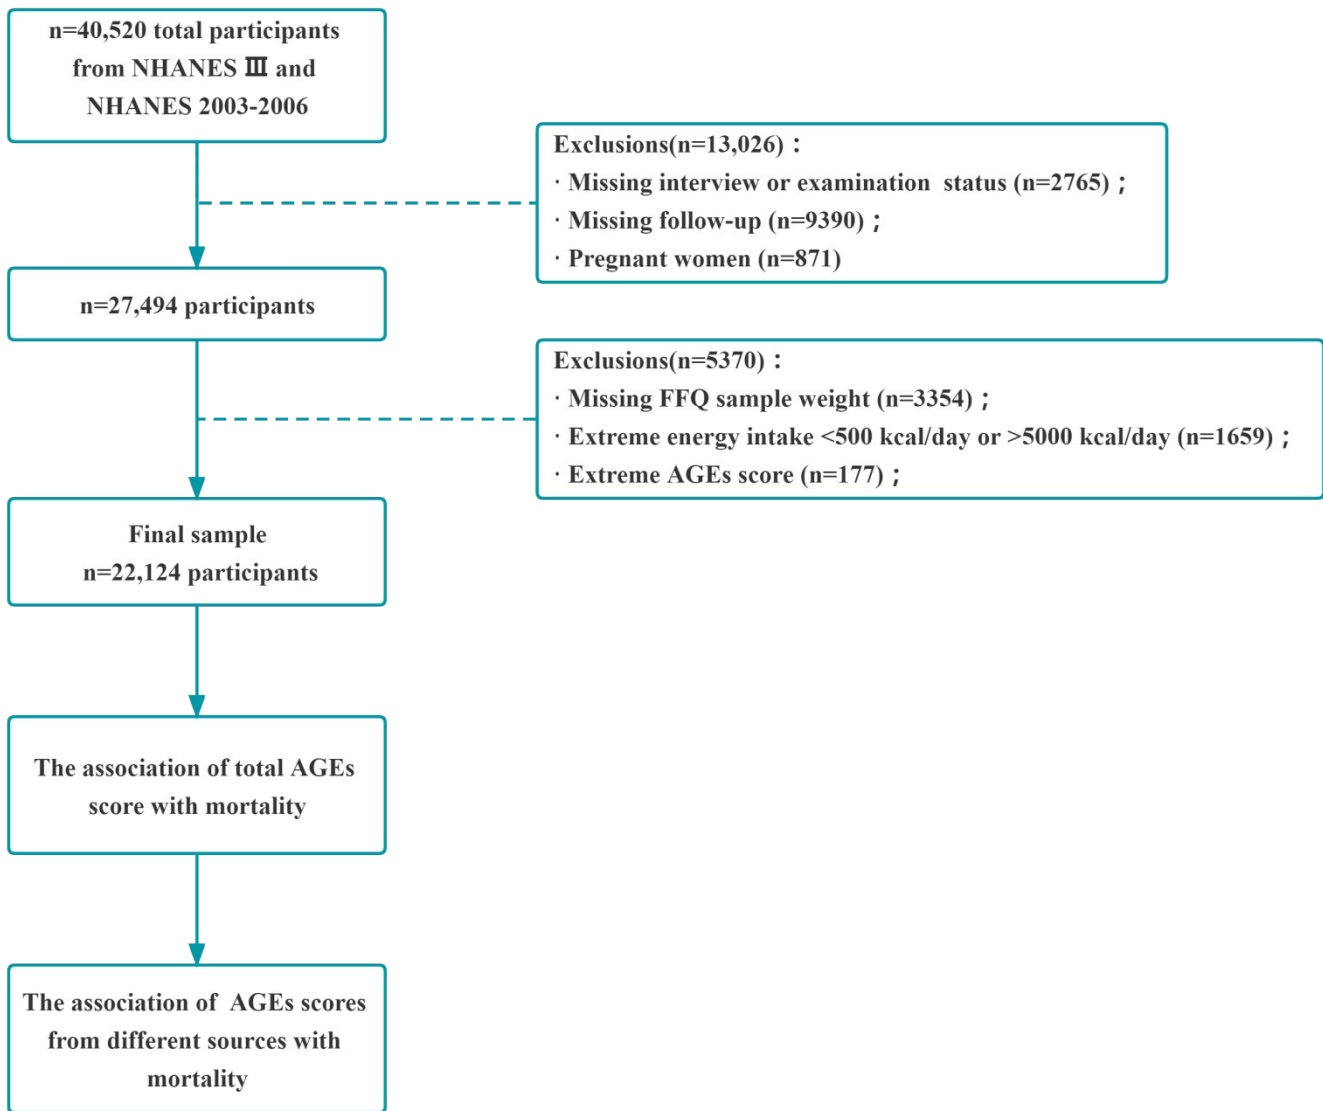

**Figure S1. Flow Chart of Study Design**

Abbreviations: AGEs, advanced glycation end products; FFQ, food frequency questionnaire.

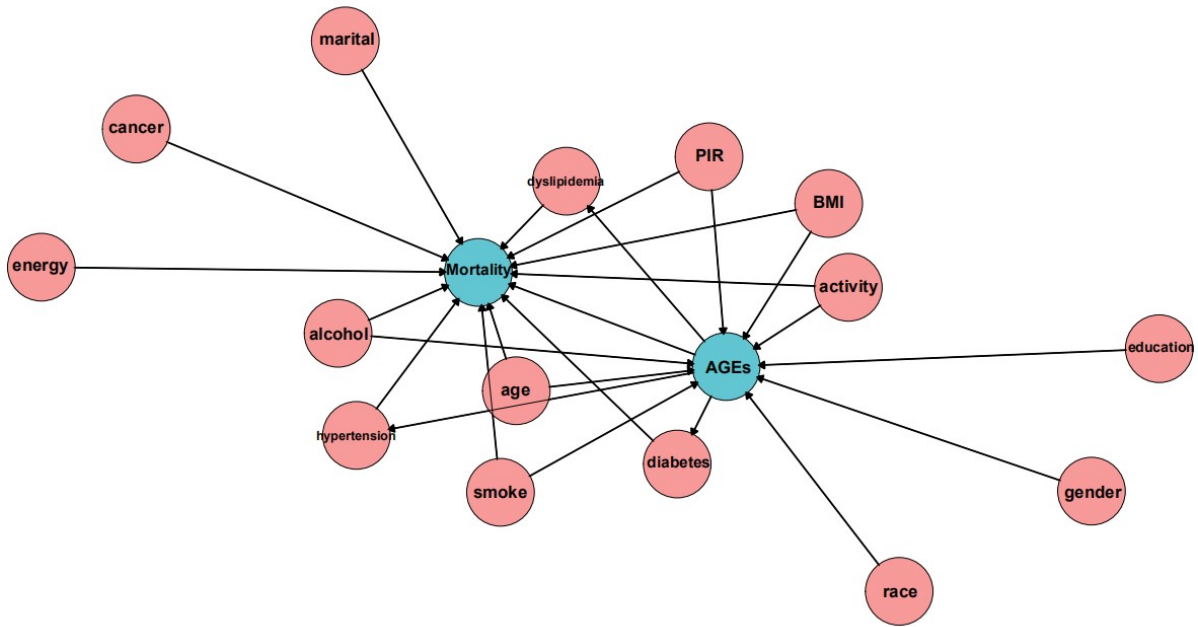

### Figure S2. Directed Acyclic Graph (DAG)

The directed acyclic graph was a tool to visualize the association between variables and their interplay in relation to the investigated association and was presented by R package “dagitty” and “ggdag”.

Abbreviations: AGEs, advanced glycation end products; BMI, body mass index; PIR, poverty income ratio; DAG, directed acyclic graph.
